# Supplementary material for: Repression of PLA2R1 by c-MYC and HIF-2alpha promotes cancer growth
Source: PubMed Central journal article supplement (PMC4011578; doi:10.18632/oncotarget.1681), 2014-01-16

## Supplementary Figures Legends

**Figure S1: PLA2R1 decreased favors RCC tumor growth.** ACHN cells were infected with a ctrl or with shRNA targeting PLA2R1 encoding vectors, puromycin selected and injected into nude mice as described in the figure 4. (A) Photographs show a representative picture of mouse at necropsy for each condition. (B) Statistical table with at each time of measure; the number of mice, the average of tumor volume, the SEM and the p value calculated using T-test.

**Figure S2: PLA2R1 expression inhibits transformation and decreases tumor growth in 786-0 cells.** 786-0 cells were infected with a control or a PLA2R1 encoding retroviral vector and puromycin selected. (A) Ectopic expression of PLA2R1 was checked by Western-Blotting. Tubulin was used as loading control. (B) Twelve thousand and five hundred 786-O cells were seeded in agar and let to grow. After 1 week, colonies were counted for each indicated conditions and representative photographs are displayed. Histograms show a representative experiment from 3 independent experiments. Statistics were performed using T-test. \*\*\* represent p value < 0.005. (C) Five millions of 786-O cells were grafted in the right flank of 7 weeks old Nude mice. Tumor growth was monitored using caliper. Tumor volume was calculated using  $V=L \times l \times H/2$ . (D) Photographs show a representative picture of mice (upper panel) and tumor (lower panel) at necropsy for each condition. Scale bar represent 1cm. (E) Statistical table representing; the time of the measure, the number of mice, the average of the tumor volume, the SEM and the p value calculated using T-test.

**Figure S3: PLA2R1 increased blocks ACHN tumorigenicity.** ACHN were infected with a control vector or a vector encoding PLA2R1, selected and injected in nude mice as described

in the figure 6 legends. (A) Photographs show a representative picture of mice at necropsy. (B) Statistical table showing for each group; the number of mice, the tumor volume average, the SEM and the  $p$  value calculated using T-test.

**Figure S4: PLA2R1 induces cell death and a proliferation decreased in 786-O derived tumors.** Control or PLA2R1 constitutively expressing 786-O-derived tumors were collected, fixed and embedded. Tissue sections from tumors were then used to analyze proliferation and cell death for each experimental condition. (A-B) Immunohistochemistry against Ki-67 proliferation marker was performed. Nuclei were counterstained by an hematoxylin solution. (A) Histogram representing the percentage of Ki-67 positive cells was displayed. Positive cells were counted on at least 4 independent fields per tumor and at least 3 independent tumors. (B) Representative photographs are shown. (C-D) TUNEL assays were performed to label dying cells. After nuclear staining by Hoechst dye, the percentage of TUNEL positive cells was calculated (at least 3 independent tumors and at least 4 independent fields/ tumor analyzed). (C) Relative TUNEL positive cells were represented. (D) Images are shown.

**Figure S1,**  
**Vindrieux *et al.***

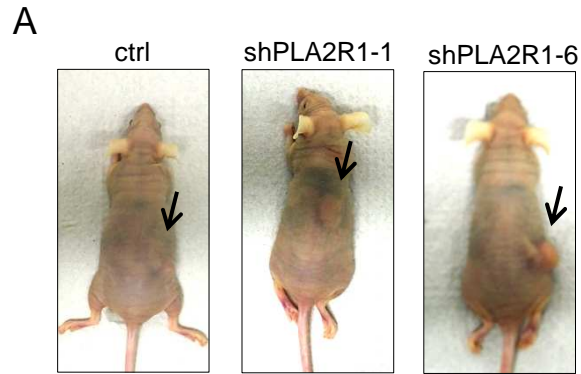

**B**

| D16        | Nb of mice | Tumor vol. (mm <sup>3</sup> ) | SEM  | t-Test/ctrl p value |
|------------|------------|-------------------------------|------|---------------------|
| ctrl       | 4          | 13.3                          | 9,1  |                     |
| shPLA2R1-1 | 5          | 41,9                          | 3,5  | 0,02735             |
| shPLA2R1-6 | 5          | 57,4                          | 10,6 | 0,02033             |
| D23        | Nb of mice | Tumor vol. (mm <sup>3</sup> ) | SEM  | t-Test/ctrl p value |
| ctrl       | 4          | 21,2                          | 9,1  |                     |
| shPLA2R1-1 | 5          | 82,6                          | 19,2 | 0,02991             |
| shPLA2R1-6 | 5          | 117,1                         | 32,4 | 0,03070             |
| D27        | Nb of mice | Tumor vol. (mm <sup>3</sup> ) | SEM  | t-Test/ctrl p value |
| ctrl       | 4          | 25,8                          | 8,6  |                     |
| shPLA2R1-1 | 5          | 111,7                         | 23,4 | 0,01356             |
| shPLA2R1-6 | 5          | 146,8                         | 31,1 | 0,00878             |
| D30        | Nb of mice | Tumor vol. (mm <sup>3</sup> ) | SEM  | t-Test/ctrl p value |
| ctrl       | 4          | 46,8                          | 14,8 |                     |
| shPLA2R1-1 | 5          | 147                           | 25,3 | 0,01268             |
| shPLA2R1-6 | 5          | 196,5                         | 31,9 | 0,00424             |
| D34        | Nb of mice | Tumor vol. (mm <sup>3</sup> ) | SEM  | t-Test/ctrl p value |
| ctrl       | 4          | 51,8                          | 16,6 |                     |
| shPLA2R1-1 | 5          | 172,5                         | 35,2 | 0,02047             |
| shPLA2R1-6 | 5          | 227,1                         | 33,8 | 0,00230             |
| D37        | Nb of mice | Tumor vol. (mm <sup>3</sup> ) | SEM  | t-Test/ctrl p value |
| ctrl       | 4          | 62,2                          | 20   |                     |
| shPLA2R1-1 | 5          | 189,7                         | 43,8 | 0,04337             |
| shPLA2R1-6 | 5          | 254,4                         | 31,8 | 0,00121             |
| D42        | Nb of mice | Tumor vol. (mm <sup>3</sup> ) | SEM  | t-Test/ctrl p value |
| ctrl       | 4          | 83,5                          | 35   |                     |
| shPLA2R1-1 | 5          | 222,8                         | 44,2 | 0,05726             |
| shPLA2R1-6 | 5          | 305,2                         | 44,9 | 0,00665             |
| D47        | Nb of mice | Tumor vol. (mm <sup>3</sup> ) | SEM  | t-Test/ctrl p value |
| ctrl       | 4          | 111,8                         | 50,3 |                     |
| shPLA2R1-1 | 5          | 280,6                         | 48,8 | 0,06233             |
| shPLA2R1-6 | 5          | 352,5                         | 57,6 | 0,01970             |

**Figure S2,**  
**Vindrieux *et al.***

**A**

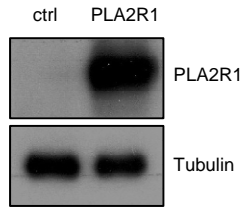

**B**

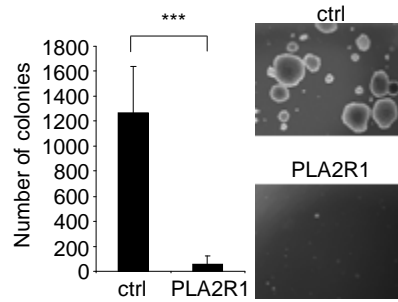

**C**

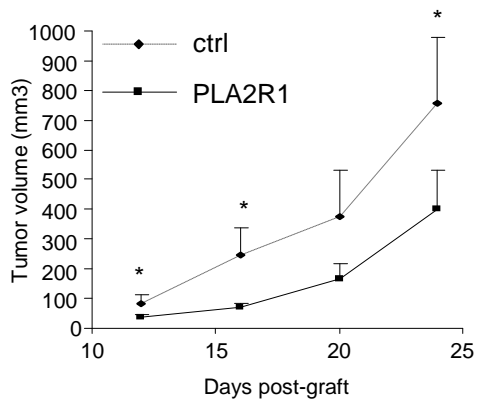

**D**

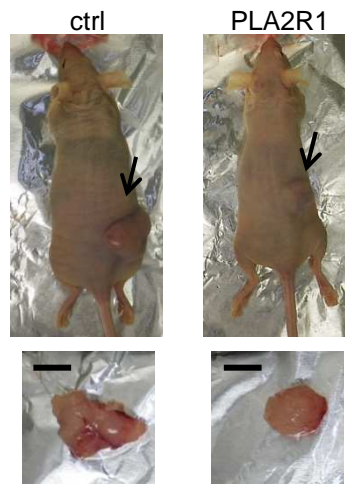

**E**

| D12    | Nb of mice | Tumor vol. (mm <sup>3</sup> ) | SEM  | t-Test p value |
|--------|------------|-------------------------------|------|----------------|
| ctrl   | 4          | 45.7                          | 14.6 |                |
| PLA2R1 | 4          | 21.1                          | 5.1  | 0.019132       |

  

| D16    | Nb of mice | Tumor vol. (mm <sup>3</sup> ) | SEM  | t-Test p value |
|--------|------------|-------------------------------|------|----------------|
| ctrl   | 4          | 117                           | 27.3 |                |
| PLA2R1 | 4          | 36.6                          | 5.1  | 0.001143       |

  

| D20    | Nb of mice | Tumor vol. (mm <sup>3</sup> ) | SEM  | t-Test p value |
|--------|------------|-------------------------------|------|----------------|
| ctrl   | 4          | 206                           | 101  |                |
| PLA2R1 | 4          | 94.8                          | 31.1 | 0.080591       |

  

| D24    | Nb of mice | Tumor vol. (mm <sup>3</sup> ) | SEM  | t-Test p value |
|--------|------------|-------------------------------|------|----------------|
| ctrl   | 4          | 591                           | 248  |                |
| PLA2R1 | 4          | 257                           | 71.4 | 0,041398       |

**Figure S3,**  
**Vindrieux *et al.***

**A**

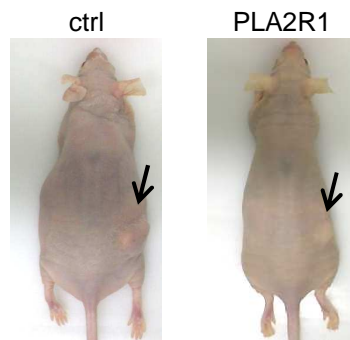

**B**

| D19    | Nb of mice | Tumor vol. (mm <sup>3</sup> ) | SEM | t-Test p value |
|--------|------------|-------------------------------|-----|----------------|
| ctrl   | 4          | 75                            | 9.5 |                |
| PLA2R1 | 5          | 34                            | 4.5 | 0.00639        |

  

| D25    | Nb of mice | Tumor vol. (mm <sup>3</sup> ) | SEM | t-Test p value |
|--------|------------|-------------------------------|-----|----------------|
| ctrl   | 4          | 105                           | 9   |                |
| PLA2R1 | 5          | 35                            | 7   | 0.00058        |

  

| D39    | Nb of mice | Tumor vol. (mm <sup>3</sup> ) | SEM  | t-Test p value |
|--------|------------|-------------------------------|------|----------------|
| ctrl   | 4          | 132.5                         | 18.5 |                |
| PLA2R1 | 5          | 44                            | 5    | 0.00227        |

  

| D60    | Nb of mice | Tumor vol. (mm <sup>3</sup> ) | SEM | t-Test p value |
|--------|------------|-------------------------------|-----|----------------|
| ctrl   | 4          | 217                           | 45  |                |
| PLA2R1 | 5          | 106                           | 13  | 0.04756        |

  

| D75    | Nb of mice | Tumor vol. (mm <sup>3</sup> ) | SEM | t-Test p value |
|--------|------------|-------------------------------|-----|----------------|
| ctrl   | 4          | 265                           | 42  |                |
| PLA2R1 | 5          | 147                           | 28  | 0.05736        |

  

| D89    | Nb of mice | Tumor vol. (mm <sup>3</sup> ) | SEM | t-Test p value |
|--------|------------|-------------------------------|-----|----------------|
| ctrl   | 4          | 351                           | 48  |                |
| PLA2R1 | 5          | 161                           | 45  | 0.0286         |

  

| D104   | Nb of mice | Tumor vol. (mm <sup>3</sup> ) | SEM  | t-Test p value |
|--------|------------|-------------------------------|------|----------------|
| ctrl   | 4          | 391                           | 42   |                |
| PLA2R1 | 5          | 137                           | 25.5 | 0.00149        |

**Figure S4,**  
**Vindrieux *et al.***

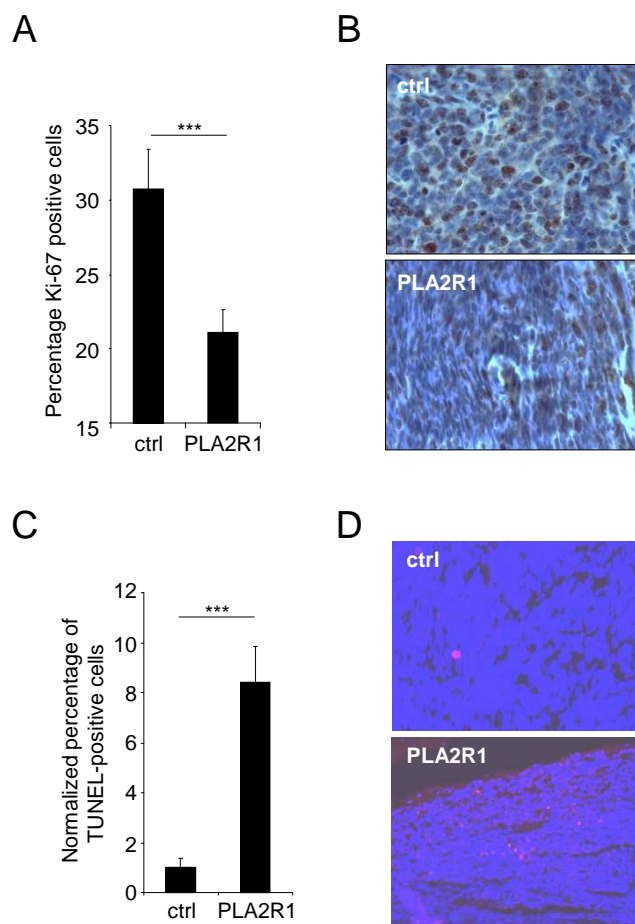

Supplement: oncotarget-05-1004-s001.pdf [file oncotarget-05-1004-s001.pdf]
