# Supplementary material for: Repression of PLA2R1 by c-MYC and HIF-2alpha promotes cancer growth
Source: PubMed Central journal article supplement (PMC4011578; doi:10.18632/oncotarget.1681), 2014-01-16
Supplement: oncotarget-05-1004-s002.pdf [file oncotarget-05-1004-s002.pdf]

## **Supplementary Tables Legends**

**Table S1: Primers and UPL probes for performing the qRT-PCR experiments are listed.**

**Table S2: Primers used for the chromatin immunoprecipitation experiments.**

**Table S3: Primers used for PCR after sodium bisulfite modification.**

**Table S1,**  
**Vindrieux *et al.***

| <b>GENE<br/>NAME</b> |                | <b>PRIMERS SEQUENCES</b> | <b>probe<br/>UPL Nb</b> |
|----------------------|----------------|--------------------------|-------------------------|
| <b>PLA2R1</b>        | <b>Forward</b> | CATAAGTGGATTTCTTATGGGTCA | <b>22</b>               |
|                      | <b>Reverse</b> | CCCTTTGATTGTATGCAAATCTT  |                         |
| <b>PPIA</b>          | <b>Forward</b> | CCTAAAGCATACGGGTCCTG     | <b>48</b>               |
|                      | <b>Reverse</b> | TTTCACTTTGCCAAACACCA     |                         |
| <b>ACTIN</b>         | <b>Forward</b> | ATTGGCAATGAGCGGTTC       | <b>11</b>               |
|                      | <b>Reverse</b> | GGATGCCACAGGACTCCAT      |                         |
| <b>VHL</b>           | <b>Forward</b> | CTGGAAGACCACCCAAATGT     | <b>1</b>                |
|                      | <b>Reverse</b> | GATGTGCAATGCGCTCCT       |                         |

**Table S2,**  
**Vindrieux *et al.***

| target         | sequences            |
|----------------|----------------------|
| PHD3 fwd       | AGTGTCCGTTCCCAGCTCAG |
| PHD3 rev       | TAGGCACAGTAAACAGGCC  |
| PLA2R1 PR1 fwd | TGGTCGAAGGAGAGGAAGAA |
| PLA2R1 PR1 rev | GTGCTGGGCCTAGACAAGAG |
| PLA2R1 PR2 fwd | CAGCTGGGTTCCTACTAGGC |
| PLA2R1 PR2 rev | GAGTTGTGGGTGAGCGATTT |
| PLA2R1 PR3 fwd | GTGGCTGCCTTTATTTAGC  |
| PLA2R1 PR3 rev | TATGGTGGGTATTGGGAGGA |
| PLA2R1 PR4 fwd | CATTTTCAGGCCCTGTAGGA |
| PLA2R1 PR4 rev | GAATCTCACATGCCACCTT  |

**Table S3,**  
**Vindrieux *et al.***

| positions from <i>PLA2R1</i><br>transcription start site |         | PRIMERS SEQUENCES         |
|----------------------------------------------------------|---------|---------------------------|
| -378 to +71                                              | Forward | AAAGGAGTTTAGGATTTTTTTAAAG |
|                                                          | Reverse | AAACCTTACCAACCCAAAACC     |
| +45 to +497                                              | Foward  | TTTAGGGTTTTGGGTTGGTAAG    |
|                                                          | Reverse | AAACAAAAAACTACAAAACACCACC |
